# Supplementary material for: Serum level of hepatocyte growth factor is a novel marker of predicting the outcome and resistance to the treatment with trastuzumab in HER2-positive patients with metastatic gastric cancer
Source: PubMed Central journal article supplement (PMC4826254; doi:10.18632/oncotarget.6753), 2015-12-24
Supplement: oncotarget-07-4925-s001.pdf [file oncotarget-07-4925-s001.pdf]

## Serum level of hepatocyte growth factor is a novel marker of predicting the outcome and resistance to the treatment with trastuzumab in HER2-positive patients with metastatic gastric cancer

### Supplementary Materials

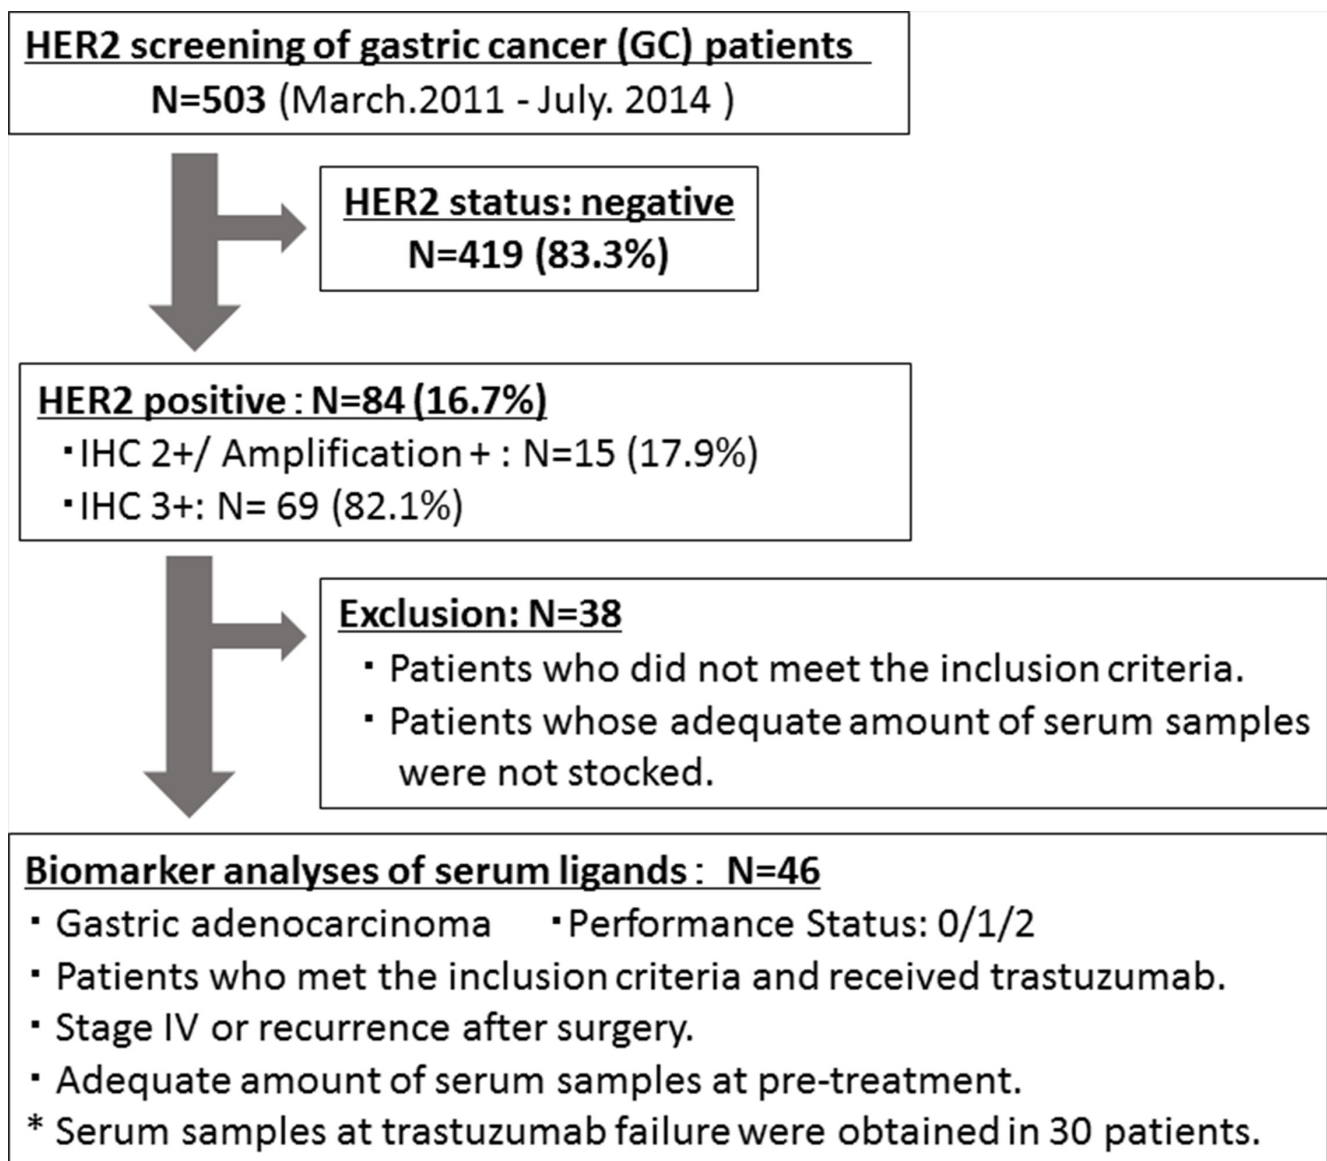

Supplementary Data S1: Diagram of this study.

## **Supplementary Material S2: Protocols of ELISA of serum ligands**

### **ELISA-HGF**

(1) we prepared all reagents, standard dilutions, and samples as directed in the product insert, (2) added 150  $\mu$ L of assay diluent to each well and then 50  $\mu$ L of standard and sample to each well, (3) covered with a plate sealer and incubated at room temperature for 2 hours, (4) aspirated each well and washed, repeating the process 3 times for a total of 4 washes, (5) we added 200  $\mu$ L of HRP conjugate to each well, (6) covered with a new plate sealer, incubated at room temperature for 2 hours, and aspirated and washed 4 times, (7) we added 200  $\mu$ L TMB substrate solution to each well and incubated at room temperature for 30 minutes with protection from light, (8) we added 50  $\mu$ L of stop solution to each well, (9) read at 450 nm within 30 minutes and set wavelength correction to 540 nm or 570 nm.

### **ELISA-Epiregulin**

(1) we prepared all reagents, standards, and samples (5x diluted with sample diluent), (2) added 100  $\mu$ L of standard and sample per well and covered with a plate sealer, and then incubated for 2 hours at 37°C, (3) removed the liquid from each well, (4) added 100  $\mu$ L of Biotin-antibody (1x) to each well and covered with a plate sealer, and then incubated for 1 hour at 37°C, (5) aspirated each well and washed, repeating the process two times for a total of three washes, (6) added 100  $\mu$ L of HRP-avidin (1x) to each well and covered with a plate sealer, and incubated for 1 hour at 37°C, (7) repeated the aspiration/wash process five times, (8) added 90  $\mu$ L of TMB substrate to each well and incubated for 15–30 minutes at 37°C with protection from light, (9) added 50  $\mu$ L of Stop Solution to each well, read at 450 nm within 30 minutes and set wavelength correction to 540 nm or 570 nm.

### **ELISA-Amphiregulin**

(1) we prepared all reagents, standards, and samples, (2) added 100  $\mu$ L of standard and sample per well and covered with a plate sealer, and then incubated for 2 hours at 37°C, (3) removed the liquid from each well, (4) Added 100  $\mu$ L of Detection Reagent A working solution to each well, and then incubated for 1 hour at 37°C, (5) added 350  $\mu$ L of washed buffer and aspirate each well and wash, repeating the process twice for a total of three washes, (6) added 100  $\mu$ L of Detection Reagent B working solution to each well and incubated for 30 minutes at 37°C after covering it with the Plate sealer, (7) repeated the aspiration/wash process three times, (8) added 90  $\mu$ L of TMB substrate to each well and incubated for

25–30 minutes at 37°C with protection from light, (9) added 50  $\mu$ L of Stop Solution to each well, read at 450 nm within 30 minutes.

### **ELISA-EGF**

(1) we prepared all reagents, standards and samples, and then 50  $\mu$ L Assay Diluent for serum samples, (2) added 200  $\mu$ L of standard and sample per well and covered with a plate sealer, and then incubated for 2 hours at 37°C, (3) aspirated each well and wash, repeating the process twice for a total of 3 washes, (4) added 200  $\mu$ L of Conjugate to each well and covered with a new plate sealer, and then incubated at room temperature for 2 hours, (5) aspirated each well and wash, repeating the process for a total of three washes, (6) added 200  $\mu$ L of substrate solution to each well and incubated for 20 minutes at 37°C with protection from light, (9) added 50  $\mu$ L of Stop Solution to each well, read at 450 nm within 30 minutes and set wavelength correction to 540 nm or 570 nm.

### **ELISA-TGF alpha**

(1) we prepared all reagents, standards, and samples, (2) added 50  $\mu$ L of standard and sample per well and covered with a plate sealer, and then incubated for 2 hours at 37°C, (3) aspirated each well and wash, repeating the process three times for a total of 4 washes (4) added 200  $\mu$ L of Conjugate to each well, and covered with a new plate sealer, and incubate at room temperature for 2 hours, (5) aspirated each well and washed four times, (6) added 200  $\mu$ L of substrate solution to each well and incubated for 30 minutes at 37°C with protection from light, (9) added 50  $\mu$ L of Stop Solution to each well, read at 450 nm within 30 minutes and set wavelength correction to 540 nm or 570 nm.

### **ELISA-Neureglin 1**

(1) we prepared all reagents, standards, and samples, (2) added 100  $\mu$ L of standard and sample per well and covered with a plate sealer, and then incubated for 2 hours at 37°C, (3) removed the liquid from each well, (4) added 100  $\mu$ L of Biotin-antibody (1x) to each well and covered with a new adhesive strip, and then incubated for 1 hour at 37°C, (5) aspirate each well and wash, repeating the process two times for a total of three washes, (6) added 100  $\mu$ L of HRP-avidin (1x) to each well and covered the microtiter plate with a new adhesive strip, and then incubated for 1 hour at 37°C, (7) repeated the aspiration/wash process five times, (8) added 90  $\mu$ L of TMB substrate to each well and incubated for 15–30 minutes at 37°C with protection from light, (9) added 50  $\mu$ L of Stop Solution to each well, read at 450 nm within 30 minutes and set wavelength correction to 540 nm or 570 nm.

## **ELISA-IGF-1**

(1) we prepared all reagents, standards, and samples, (2) added 150  $\mu\text{L}$  of Assay Diluent to each well and added 50  $\mu\text{l}$  of standard and sample per well, and then covered with a plate sealer and incubated for 2 hours at  $4^{\circ}\text{C}$ , (3) aspirated each well and washed, repeating the process 3 times for a total of four washes, (4) Added 200  $\mu\text{L}$  of

cold Conjugate to each well and covered with a new plate sealer, and incubated at  $4^{\circ}\text{C}$  for 1 hour, (5) aspirated each well and wash four times, (8) added 200  $\mu\text{l}$  of TMB substrate to each well and incubated for 30 minutes at  $37^{\circ}\text{C}$  with protection from light, (9) added 50  $\mu\text{l}$  of Stop Solution to each well, read at 450 nm within 30 minutes and set wavelength correction to 540 nm or 570 nm.

**Supplementary Material S3: Comparison of patient's characteristics by serum levels (high/low) of HGF and EREG (cut-off value: median)**

|                                      | <b>HGF low<br/>(n = 23)</b> | <b>HGF high<br/>(n = 23)</b> | <b>p-value</b> |
|--------------------------------------|-----------------------------|------------------------------|----------------|
| <b>Median Age (range)</b>            | 68 (36–85)                  | 67.5 (45–80)                 |                |
| <b>Gender (%)</b>                    |                             |                              | 1.000          |
| Male                                 | 21 (91.3)                   | 22 (95.7)                    |                |
| Female                               | 2 (8.7)                     | 1 (4.3)                      |                |
| <b>ECOG PS (%)</b>                   |                             |                              | 1.000          |
| 0–1                                  | 22 (95.7)                   | 22 (95.7)                    |                |
| 2                                    | 1 (4.3)                     | 1 (4.3)                      |                |
| <b>Histological type (%)</b>         |                             |                              | 0.514          |
| Differentiated                       | 18 (78.3)                   | 15 (65.2)                    |                |
| Undifferentiated                     | 5 (21.7)                    | 8 (34.8)                     |                |
| <b>Primary site (%)</b>              |                             |                              | 0.768          |
| Proximal                             | 12 (52.2)                   | 10 (43.5)                    |                |
| Distal                               | 11 (47.8)                   | 13 (56.5)                    |                |
| <b>Number of metastatic site (%)</b> |                             |                              | 0.376          |
| 1                                    | 13 (56.5)                   | 9 (39.1)                     |                |
| 2 ≤                                  | 10 (43.5)                   | 14 (60.9)                    |                |
| <b>Metastatic site (%)</b>           |                             |                              |                |
| Liver                                | 10 (43.5)                   | 17 (73.9)                    | 0.071          |
| Lung                                 | 3 (13.0)                    | 1 (4.3)                      | 0.608          |
| Peritoneum                           | 5 (21.7)                    | 8 (34.8)                     | 0.514          |
| Lymph node                           | 18 (78.3)                   | 15 (65.2)                    | 0.514          |
| <b>HER2 status (%)</b>               |                             |                              | 1.000          |
| IHC 3+                               | 19 (82.6)                   | 20 (87.0)                    |                |
| IHC 2+ / amplification +             | 4 (17.4)                    | 3 (13.0)                     |                |

|                              | <b>EREG low<br/>(n = 23)</b> | <b>EREG high<br/>(n = 23)</b> | <b>p-value</b> |
|------------------------------|------------------------------|-------------------------------|----------------|
| <b>Median Age (range)</b>    | 68.0 (41–85)                 | 67.0 (36–82)                  |                |
| <b>Gender (%)</b>            |                              |                               | 1.000          |
| Male                         | 21 (91.3)                    | 22 (95.7)                     |                |
| Female                       | 2 (8.7)                      | 1 (4.3)                       |                |
| <b>ECOG PS (%)</b>           |                              |                               | 1.000          |
| 0–1                          | 22 (95.7)                    | 23 (95.7)                     |                |
| 2                            | 1 (4.3)                      | 1 (4.3)                       |                |
| <b>Histological type (%)</b> |                              |                               | 0.514          |
| Differentiated               | 18 (78.3)                    | 15 (65.2)                     |                |
| Undifferentiated             | 5 (21.7)                     | 8 (34.8)                      |                |
| <b>Primary site (%)</b>      |                              |                               | 1.000          |

|                                      |           |           |       |
|--------------------------------------|-----------|-----------|-------|
| Proximal                             | 11 (47.8) | 11 (47.8) |       |
| Distal                               | 12 (52.2) | 12 (52.2) |       |
| <b>Number of metastatic site (%)</b> |           |           | 1.000 |
| 1                                    | 11 (47.8) | 10 (43.5) |       |
| 2 ≤                                  | 12 (52.2) | 13 (56.5) |       |
| <b>Metastatic site (%)</b>           |           |           |       |
| Liver                                | 13 (56.5) | 14 (60.9) | 1.000 |
| Lung                                 | 4 (17.4)  | 2 (8.7)   | 0.665 |
| Peritoneum                           | 3 (13.0)  | 10 (43.5) | 0.047 |
| Lymph node                           | 18 (78.3) | 15 (65.2) | 0.514 |
| <b>HER2 status (%)</b>               |           |           | 1.000 |
| IHC 3+                               | 19 (82.6) | 20 (87.0) |       |
| IHC 2+ / amplification +             | 4 (17.4)  | 3 (13.0)  |       |

Abbreviations: ECOG = Eastern Cooperative Oncology Group, PS = performance status, IHC = immunohistochemistry.

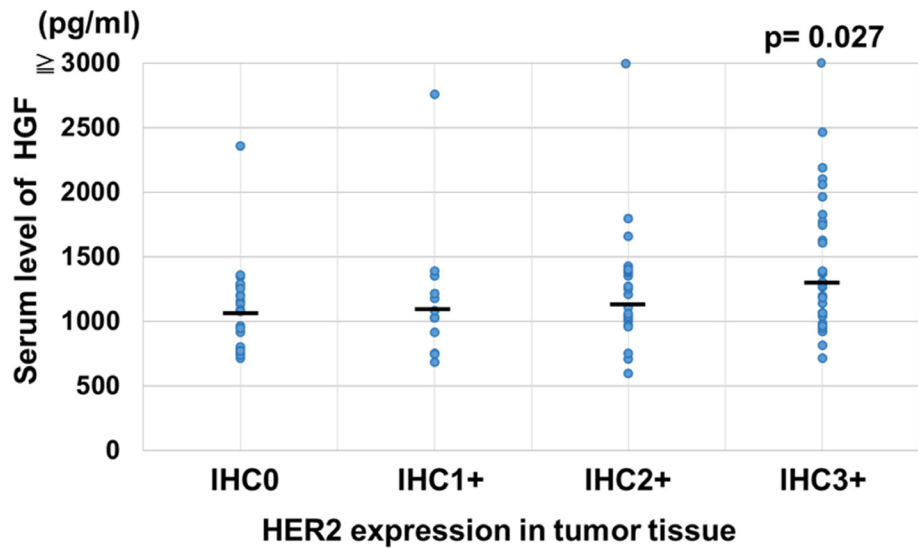

Supplementary Data S4: Serum levels of HGF by HER2 expression in HER2- positive gastric cancer patients who received first-line chemotherapy with trastuzumab.
